# Supplementary material for: Effect of Financial Incentives and Environmental Strategies on Weight Loss in the Healthy Weigh Study: A Randomized Clinical Trial
Source: PubMed Central journal article supplement (PMC8424479; doi:10.1001/jamanetworkopen.2021.24132), 2021-09-07
Supplement: jamanetwopen-e2124132-s001.pdf [file jamanetwopen-e2124132-s001.pdf]

# A Randomized Controlled Trial of Incentives vs Environmental Strategies for Weight Loss

Study Protocol

v August 3, 2015

|    |    |                                                                                 |   |
|----|----|---------------------------------------------------------------------------------|---|
| 1  |    |                                                                                 |   |
| 2  |    |                                                                                 |   |
| 3  |    |                                                                                 |   |
| 4  |    | Study Protocol                                                                  |   |
| 5  |    | v August 3, 2015                                                                |   |
| 6  | 1. | Abstract.....                                                                   | 4 |
| 7  | 2. | Background .....                                                                | 4 |
| 8  |    | 2.1. Impact of Obesity on Health, Benefits of Weight Loss                       |   |
| 9  |    | 2.2. Changes in benefit design and the use of incentives for employees          |   |
| 10 |    | 2.3. Use of Financial Incentives to Change Health Behavior in General           |   |
| 11 |    | 2.4. Effects of Financial Incentive Interventions for Obese Patients            |   |
| 12 |    | 2.5. Impact of Environmental Changes on Food intake and Physical activity       |   |
| 13 |    | 2.6. Cost of Obesity and Cost-effectiveness of Behavioral Interventions         |   |
| 14 | 3. | Data Management/Way to Health Platform .....                                    | 7 |
| 15 | 4. | Overall Objectives/ Specific Aims .....                                         | 8 |
| 16 |    | Primary Aims                                                                    |   |
| 17 |    | 1. Lottery vs. Control Group                                                    |   |
| 18 |    | 2. Environmental Strategy vs. Control Group                                     |   |
| 19 |    | 3. Combined Incentive and Environmental Strategy vs. Control Group              |   |
| 20 |    | 4. Combined Incentive and Environmental Strategy and Weight loss over 18 months |   |
| 21 |    | Secondary Aims                                                                  |   |
| 22 |    | 5. Assess costs by arm                                                          |   |
| 23 | 5. | Primary Outcome Variable.....                                                   | 9 |
| 24 |    | 5.1. Change in weight from BL to 18M                                            |   |
| 25 |    | 5.2 Specific Aims 1-3                                                           |   |
| 26 |    | 5.3 Specific Aim 4                                                              |   |
| 27 | 6. | Secondary Outcome Variable(s) .....                                             | 9 |
| 28 |    | 6.1 Specific Aim 5                                                              |   |

29 7. Study Instruments.....9

30 7.1 Surveys and Assessments

31 7.2 Demographic Measures

32 7.3 Physical Activity

33 7.4 Dietary Behavior

34 7.5 Stages of Change Model

35 7.7 Biometric Assessment Data Part A

36 7.8 Biometrics Assessment Data Part B

37 7.9 Medical History

38 7.10 Health Related Quality of life

39 7.11 Healthy Utility Index (HUI)

40 7.12 Insurance Claims

41 7.13 Withings Scale

42 8. Study Design ..... 10

43 8.1. Research Design and Methods

44 8.2. Measurement of cost effectiveness

45 8.3. Key Inclusion Criteria

46 8.4. Key Exclusion Criteria

47 9. Subject Recruitment ..... 13

48 9.1. Target Population

49 9.2. Accrual

50 9.3 Subject Recruitment

51 9.4 Subject Compensation

52 10. Study Procedures..... 14

53 Consent Process

54 10.1 Overview

55 Procedures

56 10.2 Baseline pre-treatment assessment for patients

57 10.3 Randomization

58 10.4 Environmental Change Strategies

59 10.5 Design of the Incentives

60 10.6 Study Duration

61 10.7 Dissemination

62 11. Analysis Plan ..... 18

63 11.1 Statistical Considerations

64 11.2 Power and Sample Size Consideration

65 11.3 Measurement of Effect

66 12. Human Research Protection ..... 21

67 12.1 Subject Confidentiality

68 12.2 Subject Privacy

69 12. 3 Protection of Human Participants

70 12.4 Cost Effectiveness Analysis

71 12.5 Source of Materials

72 12.6 Potential Risks Involved in the Proposed Study

73 12.7 Risks Involved in the Cost-Effectiveness Analysis

74 12.8 Adequacy of Protection from Risks Recruitment and Informed Consent

75 12.9 Protection against risk

76 12.10 Electronic Data Security

77 12.11 Potential Study Benefits

78 12.12 Resources necessary for Human Research Protection

79 13. Data Protection ..... 27

80 13.1 Data and Safety Monitoring Plan

81 13.2 Data and Safety Monitoring Board

82 13.3 Potential Study Benefits

83 13.4 Alternatives to Participation

84 13.5 Risk/Benefit Assessment

85

86

87 **1. Abstract**

88 Identifying effective strategies for treating obesity is both a clinical challenge and a public health  
89 priority. Between 1960 and 2010, obesity prevalence (body mass index [BMI] 30 kg/m<sup>2</sup>) in US adults  
90 increased from 11% to 35.5% in men and from 16% to 35.8% in women, and about 70% of US adults are  
91 considered either overweight or obese. This situation has troubling implications, as obesity in young  
92 adulthood and middle age translates into higher rates of cardiovascular risk factors, disability,  
93 hospitalization, Medicare expenditures, and mortality risk later in life. While a variety of approaches are  
94 successful in achieving initial weight loss techniques for combining initial weight loss and successful  
95 maintenance of weight loss have been elusive. Research shows that most people who successfully lose  
96 weight will regain 1/3 to 2/3 of that weight after one year. Rigorous testing of promising, innovative  
97 approaches to weight loss and maintenance is an important public health priority. While both behavioral  
98 economic and environmental strategies have shown promise, we propose to test a novel blend of these  
99 approaches in this initiative. We will also test these interventions in populations with a high rate of  
100 African Americans and low to moderate income individuals who are obese, addressing important  
101 concerns about the health disparities due to high rates of obesity. The proposed study will evaluate the  
102 comparative effectiveness of behavioral economic financial incentives and environmental strategies,  
103 separately and together, in achieving initial weight loss and maintenance of weight loss, in obese  
104 employee populations. Our study contributes to the CDC's efforts to combat obesity but in particular to  
105 CDC's winnable battles (physical activity and obesity); the NCCDPHP strategic priorities around well-  
106 being, health equity, and evaluation and dissemination of environmental and systems-wide solutions to  
107 address public health problems; and the NCCDPHP domain around healthier worksite initiatives, CDC  
108 efforts to improve nutrition and physical activity to prevent obesity, and reduction of cardiovascular  
109 disease risk. We propose a 4-arm randomized controlled trial (RCT) in which 328 employees of the City  
110 of Philadelphia, IBC, and SEPTA with initial Body Mass Index of 30 or greater and at least 1 other  
111 cardiovascular risk factor (high blood pressure, hypercholesterolemia, diabetes, smoking) will be  
112 randomized to receive one of the following: 1) Daily lottery type incentives tied to achievement of  
113 weight loss goals (incentive arm); 2) individually tailored environmental strategies around food intake  
114 and physical activity (environmental arm); 3) a combination of incentives and environmental strategies  
115 (combined arm); or 4) standard employee wellness benefits and weigh-ins every 6 months (control arm).  
116 Phase I of the study (first 6 months) will focus on weight loss; Phase II (months 7-18) will focus on  
117 continued weight loss or maintenance for those who choose to maintain weight loss as opposed to  
118 continuing to try to lose weight; Phase III (months 19-24) will provide a period of post-intervention  
119 follow-up to measure sustainability of effects.

120 **2. Background**

121 2.1 Impact of Obesity on Health, Benefits of Weight Loss. Obesity is the second leading cause of  
122 preventable death in the United States, associated with high blood pressure (BP), type 2 diabetes,  
123 coronary heart disease, and osteoarthritis. Weight loss of just 5-10 kg can improve risk factors (e.g., BP,  
124 glycemia, and serum lipid levels) and reduce the incidence of diabetes. In older adults, weight loss  
125 interventions have shown clear improvements in BP, arthritis, and functional status. However,  
126 maintenance of weight loss is needed to achieve long term health benefits, and successful strategies for

127 long-term maintenance are lacking. Weight regain after a period of intentional weight loss is widely  
128 observed with all interventions due to loss of motivation, lack of sustained rewards for weight loss  
129 behavior, difficulty adhering to diet, and need for ego-depleting exertion of willpower. Since weight loss  
130 programs offered as part of standard employer-sponsored benefits are generally unsuccessful in  
131 achieving weight loss maintenance, supplemental motivation from incentives or environmental  
132 feedback may help people keep weight off.

133 2.2 Changes in benefit design and the use of incentives for employees. There have been significant shifts  
134 in recent years in the use of incentives to increase healthy behaviors among employees of American  
135 companies. HIPAA's 2006 regulations permitted employer health plans to offer financial incentives for  
136 achieving health- contingent standards such as body mass index as long as this was part of a wellness  
137 program. Programs were required to meet a number of conditions, including that they have a  
138 "reasonable chance" of improving health and not be "overly burdensome. The Affordable Care Act  
139 (ACA) increased the incentive ceiling to 30% of coverage costs and gave regulators the authority to  
140 further increase the ceiling to 50% if "appropriate." In recently issued final rules, regulators lifted the  
141 ceiling to 50% as long as any incentives beyond the 30% threshold targeted tobacco use.<sup>99</sup> In 2013,  
142 approximately 85% of large employers in the US are using incentives for healthy behavior, making the  
143 use of such approaches increasingly a widely used standard for efforts to reduce obesity. However, the  
144 approaches being utilized generally have not been well tested and rarely utilize insights from behavioral  
145 economics that utilize the decision errors that are common in people to design more effective programs.  
146 These strategies also fail to incorporate environmental change strategies which are increasingly  
147 recognized as important to obesity reduction and maintenance of healthy weight, and few such  
148 strategies have been rigorously evaluated in the context of weight management programs.

149 2.3 Use of Financial Incentives to Change Health Behaviors in General. Individuals put disproportionate  
150 value on present relative to future costs and benefits, known as present-biased preferences. While this  
151 bias typically works against healthy behavior, the same factors can be used to promote healthy behavior  
152 by providing tangible but small immediate rewards for beneficial behaviors. Evidence from hard-to-  
153 change behaviors such as tobacco and other substance use, indicate that incentives can be beneficial,  
154 but patients require regular monitoring, and frequent feedback is an important component to success. A  
155 review of 11 randomized trials of financial incentives found that financial incentives promoted  
156 adherence better than any tested alternative, leading to better blood pressure control, appointment  
157 attendance, and higher immunization rates. Other reviews have found various incentives (including  
158 lotteries) effective in changing behavior. However, few studies have examined longer-term effects of  
159 incentives on health behaviors after cessation of incentives, or the relative effectiveness of incentives vs.  
160 other obesity reduction strategies. Lottery-type incentives are particularly appealing for improving  
161 adherence to a weight loss regimen. Although small payouts (e.g., \$10 to quit smoking) may not be  
162 effective, lottery incentives have shown promise in altering health behaviors even when awards have  
163 relatively low expected values (e.g., \$50). Lotteries typically include several features that make them so  
164 appealing, despite a very low rate of return. They typically offer a combination of a relatively large  
165 chance of a small payout and a very small chance of a larger payout. The frequent small payoffs increase  
166 the attractiveness of lotteries by giving lottery players intermittent positive reinforcement. Moreover,

167 the feedback is often very rapid; most games have daily draws and more than 40% of state revenues  
168 now come from instant scratch-off tickets. The small chance of a large payoff is especially attractive  
169 because people tend to overweigh small probabilities in making decisions. Structuring financial  
170 incentives as a lottery has several benefits over a set pay-off amount. Lotteries may be less costly to  
171 provide than comparable cash incentives because of the effectiveness of intermittent reinforcement.  
172 Beyond their monetary payoffs, lotteries provide entertainment value, enhancing their reinforcing  
173 properties as a motivator. Lotteries may be particularly effective in lower-income populations (in whom  
174 lotteries are more popular), who have higher rates of non-adherence than other populations.

175 2.4 Effects of Financial Incentive Interventions for Obese Patients. Incentives are effective in weight loss  
176 interventions. Jeffery et al showed that participants without any weight management training lost  
177 weight when they deposited valuables with a therapist with return of their valuables contingent on  
178 progress towards pre-specified goals, and that incentives for weight loss are more effective than  
179 incentives for attending weight loss training. Finkelstein et al. found that over a 3- month period,  
180 participants offered \$14 per percentage point of weight loss lost 4.7 pounds whereas participants  
181 offered \$7 lost 3.0 pounds and control participants lost 2.0 pounds. In work done by our group using  
182 daily lotteries (published in JAMA), we found that about 50% of participants offered an incentive  
183 reached a weight loss goal of 1 pound per week over 16 weeks (average weight loss 13.1 pounds)  
184 compared to about 10% of control group participants (average weight loss 4.0 pounds). Dropout  
185 rates were about 7%, remarkably low for a weight loss intervention. Further work extended successful  
186 weight loss to 8 months and showed the effectiveness of competition between groups in augmenting  
187 motivation, though the individual arm was less effective without frequent feedback. These studies  
188 illustrate that incentives ideally provide frequent feedback, and that daily lottery incentives using a  
189 technology platform can be highly effective at sustaining engagement and achievement of weight loss  
190 goals.

191 2.5 Impact of Environmental Changes on Food intake and Physical activity. It has long been recognized  
192 that social and physical environmental factors influence food intake and physical activity. Worksite  
193 interventions to improve food environments have shown modest success. Most worksite nutrition  
194 and weight intervention studies have not included clearly defined environmental strategies, though  
195 combination interventions have achieved significant, albeit modest, success. The use of environmental  
196 interventions to increase physical activity is recommended, though the evidence base of intervention  
197 research is limited. Cross-sectional research indicates that having multiple environmental supports  
198 (stairways, facilities, equipment) at worksites is associated with meeting physical activity  
199 interventions. In addition to environmental changes to worksite structures, environmental re-  
200 engineering is a promising strategy and is being studied in several trials with a home environment focus.  
201 A recent study of environmental changes for weight gain prevention in worksites found no impact on  
202 body mass from environmental changes alone, perhaps due to limited strength of the interventions,  
203 deployment of single strategies in isolation, inadequate implementation, and because such studies  
204 included normal weight, overweight, and obese employees.

205 2.6 Cost of Obesity and Cost-effectiveness of Behavioral Interventions. Recent studies concluded that  
206 annual US expenditures attributable to overweight and obesity are between \$90 and \$100 billion.

207 Among nationally representative cohorts, the average annual incremental cost of obesity is about  
208 \$1,308. Higher BMIs in young adulthood and middle age are associated with substantially higher  
209 Medicare expenditures in old age. Higher BMI also translates into significantly higher health care  
210 charges within 18 months, suggesting that health plans may find it cost effective to invest in behavior  
211 modification to lower health expenditures. Several economic assessments of behavioral interventions  
212 for weight loss have been published. The Diabetes Prevention Program, reported that, compared to  
213 placebo, the intensive lifestyle intervention had cost per QALY ratios ranging between \$32,000 and  
214 \$52,000, depending upon whether direct medical costs alone or direct and indirect costs were  
215 counted. Finkelstein et al. reported that the 1-year incremental cost per 1% reduction in 10-year CHD  
216 risk associated with an enhanced behavioral intervention was \$637.135 The substantial health and  
217 economic consequences of obesity highlight the importance of testing new approaches to maintenance  
218 of weight loss and the potential cost effectiveness of successful interventions.

### 219 **3. Data Management and the Way to Health Platform**

220 The Way to Health online platform will serve as the core mechanism for recruiting and enrolling  
221 subjects, transmitting general and intervention-specific messages, collecting individual weight  
222 measurements and online survey data, and providing regular feedback to subjects on their progress in  
223 the study. This platform has supported a series of other NIH-funded studies that harness new  
224 technologies to encourage healthy behaviors and treatment adherence. The University of Pennsylvania  
225 Biomedical Informatics Consortium (BMIC) will be the hub for the hardware and database  
226 infrastructure that will support the project and where the web portal is based. The data collected for  
227 this study will be stored in MySQL databases on a dedicated BMIC-run server. All data will be stored in  
228 both a non-editable database and in a separate modifiable database, allowing researchers to correct  
229 mistakes while preserving the raw data for auditing purposes. Every SQL transaction, including  
230 accessing and changing data, will be logged for auditing purposes. Data will be entered into the  
231 database through several different mechanisms. Participants will enter their own personal information  
232 and respond to surveys through a PHP-based web interface. Researchers will have a separate interface  
233 that will allow them to manually enter data if needed. The dataset will be blinded of all personally  
234 identifiable information when exported for analysis. The web application will automatically remove all  
235 identifiers when a researcher requests an analytic dataset. The only people with access to identifiable  
236 participant information will be pre-specified research staff responsible for contacting participants for  
237 follow-up. Personal information and research data will be stored in separate SQL tables and will be  
238 linked by a computer-generated ID number. Furthermore, the web platform will be set up with pre-  
239 specified ranges of eligible values for most questions to minimize participants' data entry errors.  
240 Specifically designated administrators will have the ability to make corrections. Each modification,  
241 however, will be logged along with justification for the change. The original data will be preserved in a  
242 separate non-modifiable database. The UPENN Biomedical Informatics Consortium (BMIC) will be the  
243 hub for the hardware and database infrastructure that will support the project and where the Way to  
244 Health web portal is based. The BMIC is a joint effort of the University of Pennsylvania's Abramson  
245 Cancer Center, the Cardiovascular Institute, the Department of Pathology, and the Leonard Davis  
246 Institute. The BMIC provides a secure computing environment for a large volume of highly sensitive

247 data, including clinical, genetic, socioeconomic, and financial information. Among the IT projects  
248 currently managed by BMIC are: (1) the capture and organization of complex, longitudinal clinical data  
249 via web and clinical applications portals from cancer patients enrolled in clinical trials; (2) the integration  
250 of genetic array databases and clinical data obtained from patients with cardiovascular disease; (3)  
251 computational biology and cytometry database management and analyses; (4) economic and health  
252 policy research using Medicare claims from over 40 million Medicare beneficiaries. BMIC requires all  
253 users of data or applications on BMIC servers to complete a BMIC-hosted cybersecurity awareness  
254 course annually, which stresses federal data security policies under data use agreements with the  
255 university. Curriculum includes HIPAA training and covers secure data transfer, passwords, computer  
256 security habits and knowledge of what constitutes misuse or inappropriate use of the server. We will  
257 implement multiple, redundant protective measures to guarantee the privacy and security of the  
258 participant data. All investigators and research staff with direct access to the identifiable data will be  
259 required to undergo annual responsible conduct of research, cybersecurity, and Health Insurance  
260 Portability and Accountability Act certification in accordance with University of Pennsylvania regulations.  
261 All data for this project will be stored on the secure/firewalled servers of the BMIC Data Center, in data  
262 files that will be protected by multiple password layers. These data servers are maintained in a  
263 guarded facility behind several locked doors, with very limited physical access rights. They are also  
264 cyber-protected by extensive firewalls and multiple layers of communication encryption. Electronic  
265 access rights are carefully controlled by University of Pennsylvania system managers. We will use highly  
266 secure methods of data encryption for all transactions involving participants' financial information using  
267 a level of security comparable to what is used in commercial financial transactions. We believe this  
268 multi-layer system of data security, identical to the system protecting the University of Pennsylvania  
269 Health Systems medical records, greatly minimizes the risk of loss of privacy.

#### 270 **4. Overall Objectives/Specific Aims**

##### 271 Primary

- 272 1. Assess the effectiveness of a daily lottery-based financial incentive, relative to the control  
273 group, on cumulative weight loss over an 18-month period. *H1: Mean weight loss from*  
274 *baseline to 18 months among participants randomized to the lottery incentive will be at least*  
275 *5 kg greater than among control group participants.*
- 276 2. Assess the effectiveness of environmental strategies, relative to the control group, on  
277 cumulative weight loss over an 18-month period. *H2: Mean weight loss from baseline to 18*  
278 *months among participants randomized to the environmental strategies group will be at*  
279 *least 5 kg greater than among control group participants.*
- 280 3. Assess the effectiveness of the combined incentives and environmental strategies arm,  
281 relative to the control group, on cumulative weight loss over an 18-month period. *H3: Mean*  
282 *weight loss from baseline to 18 months among participants randomized to the combined*  
283 *arm will be at least 8 kg greater than among control group participants.*
- 284 4. Assess the comparative effectiveness of a combination of lottery-based financial incentives  
285 and environmental strategies on cumulative weight loss over an 18-month period. *H4: Mean*



286 *weight loss among participants randomized to the combined arm will be at least 3 kg*  
287 *greater than among participants in either of the individual arms.*

288  
289 Secondary

290  
291 5. Assess costs of each of the intervention arms from both the employer and social perspective  
292 and compare cost differences between each arm relative to effectiveness measured by  
293 incremental weight loss achieved. *H5: From an employer's perspective, each individual*  
294 *intervention will have favorable cost-effectiveness ratios relative to control; the combined*  
295 *arm will have a favorable cost-effectiveness ratio relative to individual arms.*

## 296 **5. Primary Outcome Variable**

297 5.1 Change in weight from baseline to 18 months.

298 5.2 Specific Aims 1-3

299 Compare effectiveness of financial incentive, environmental strategy, and combined arm to control  
300 during Phases I and II. For expected weight change between months 0-18 of -8 kg, -5 kg and 0 kg in the  
301 combined, intervention and control groups, respectively (a net difference between single intervention  
302 and control groups of 5 kg and between combined intervention and control groups of 8 kg) and  
303 assuming a standard deviation (S.D.) of weight loss of 5 kg, 65 participants per group provide 90% power  
304 to detect at least one of these contrasts. The sample size provides 80% power to detect a difference of  
305 4.6 kg in weight change between single intervention and control groups and 7.3 kg between the  
306 combined and control groups.

307 5.3 Specific Aim 4

308 Compare effectiveness of financial incentives and environmental strategies and combined arm during  
309 Phases I and II.

## 310 **6. Secondary Outcome Variable(s)**

311 Specific Aim 5

312 6.1 Compare the cost differences between each arm relative to the effectiveness measured by  
313 incremental weight loss achieved.

## 314 **7. Study Instruments**

315 7.1 Surveys/Assessments will be administered during various time points throughout the study via the  
316 online Way to Health (WTH) study platform

317 7.2 Medical history variables will be obtained as part of eligibility screening on the WTH study website.

318

319 7.3 Demographic measures will be collected at baseline (race, income, household size, education).

320 7.4 Physical Activity: The Global Physical Activity Questionnaire (GPAQ) measures adherence to national  
321 recommendations for moderate (30 minutes moderate physical activity 5 days per week) and vigorous  
322 (20 minutes continuous vigorous activity on 3 days per week) physical activity recommendations. This  
323 will be collected at 0, 6, 12, 18, and 24 months.

324 7.5 Dietary Behavior: The Food Intake 3 Factor Eating Questionnaire will be collected at months 0, 6, 12,  
325 and 18, and 24.

326 7.6 Stages of Change Model [Transtheoretical Model (TTM)], a commonly used measure of behavioral  
327 change which envisions the process of behavior change as stages through which an individual may  
328 progress, regress, or cycle as needed. This correlates with many types of health behaviors within  
329 different populations. This will be measured at 0, 6, 12, 18, and 24 months. 7.7 As an ongoing measure  
330 of health-related quality of life we will use the SF-8 form (shortened version of SF-36, to assess quality of  
331 life in different domains in the general population) to reduce data collection and respondent burden.  
332 The SF-8 form will be administered at 0, 6, 12, 18, and 24 months.

333 7.8 We will use the EuroQol survey at 0, 6, 12, 18, and 24 months. The EuroQol survey is an assessment  
334 for overall quality of life.

335 7.9 Biometric assessment data, medical benefit claims information, and wellness program activities  
336 data:

337 Biometric assessment data will be obtained as part of their routine biometric assessments by the  
338 participant's employers (or 3rd party wellness vendors who provide wellness services for employees of  
339 IBC, the City of Philadelphia, and SEPTA), all of whom share the same insurance carrier, Independence  
340 Blue Cross. {height; weight; blood pressure; cholesterol; glucose; HbA1c (if applicable to participant).  
341 The opportunity to have these data collected for free are available to employees at SEPTA, IBC, and  
342 the City of Philadelphia as part of annual wellness biometric screening. Approximately 30% of all  
343 employees participate in biometric screening. We will use this as a secondary measure for exploratory  
344 analyses.

345 Medical benefit claims information will be collected from the participants' insurer, Independence Blue  
346 Cross, which is relevant to our research.

347 Information on the participants' use of wellness program activities provided by the employers will be  
348 collected (the City of Philadelphia, IBC, SEPTA).

349 • The use of wellness program activities and biometric screening results will only be collected  
350 from the time participants enroll in the study until their completion date of the study. The  
351 medical benefit claims information will be collected starting from one year prior to participants'  
352 enrollment in the study, until their completion date of the study.

353 • The three categories of data listed above (biometric assessment data, medical benefit claims  
354 data, and wellness program activities) will be included in the informed consent form. In

355 addition, all necessary Data Use Agreements, including the method of transfer to the University  
356 of Pennsylvania, will be executed and communicated to the IRB prior to the transfer of all data.

357 7.10 Withings Scale: Digital scales will be distributed to subjects in this study to measure and  
358 electronically deliver subjects' weight measurements throughout the study using a secure wireless  
359 connection.

## 360 **8. Study Design**

### 361 8.1 Research Design and Methods

362 Study participants will be obese employees recruited from three employers: SEPTA, IBC, and the City of  
363 Philadelphia. We will structure the first 6 months of the study (Phase I) as a weight loss phase in which  
364 participants will be encouraged as a weight loss goal to lose 0.5 pound per week [Note: weight loss  
365 targets for sample size calculations use kg to fit in with the literature but we will use pounds for the  
366 incentive targets, as that is what Americans are most familiar with]. Phase II (months 7-18) will consist of  
367 a period of weight loss maintenance in which participants will be able to choose a weight loss goal each  
368 month of either 0 or 0.5, pounds of weight loss per week. Phase III (months 19-24) will be a period of  
369 post-intervention follow-up concluding with an in-person weigh-in at month 24.

370 Participants will be randomized to either a control group (information provision and the standard  
371 wellness program at each employer along with measurement of weight at 0, 6, 12, 18, and 24 months), a  
372 lottery-based financial incentive, or a series of environmental strategies and counseling regarding food  
373 intake and physical activity, or a combination of the financial incentive and environmental  
374 strategies. Participants in the incentive arm will be eligible for daily winnings based on the weights that  
375 are transmitted using wireless scales which we will provide so that they receive daily feedback on their  
376 winnings to keep weight loss goals salient. However, we will only provide the full payments based on  
377 validation of weight measurement at 6 months intervals, taking advantage of the motivating power of  
378 loss aversion by highlighting to participants that they only receive their daily winnings if they continue to  
379 maintain weight loss (or lose further weight) (an approach we have used with great success in previous  
380 studies).

381 All participants will receive \$50 after validation of weight measurements at months 0, 6, 12, 18 and 24,  
382 regardless of what their weight is, an approach we have used in many studies to minimize the risk of  
383 differential rates of lost to follow-up in the intervention and control arms. The study is powered to test  
384 the effectiveness of each intervention arm relative to control as well as the relative effectiveness of the  
385 intervention arms. A cost-effectiveness analysis will be conducted to examine potential for wider  
386 dissemination and implementation. Measures and time points are shown in Table 1 (attached with the  
387 protocol application). We will leverage existing annual biometric assessments done by each of our  
388 employer partners at baseline, 12 months, and 24 months for information on glucose, cholesterol, and  
389 blood pressure. Dependent measures for primary aims: We will use change in weight as the primary  
390 outcome measure. This will match our primary outcome with the tracking that participants are doing on  
391 their own at home using wireless scales.

392 Measures of mechanisms for degree of weight change: Approaches to assessing measures related to  
393 daily weight tracking, dietary behavior, physical activity, and psychosocial constructs are as follows:  
394 Ongoing tracking of participation: For all participants we will use the Way to Health system to track  
395 participation in their respective arm: (1) daily weigh-ins and receipt of incentives (incentive and  
396 combined arm); (2) daily weigh-ins and use of environmental strategies at home or at work  
397 (environmental, incentive, combined arm); (3) study follow-up visits attended regardless of arm. The  
398 Way to Health system will track this using a substantial degree of automation. In the Environmental and  
399 Combined arms, use of recommended strategies will be tracked by logs as described above. If necessary,  
400 a stepped approach to greater promotion of the strategies will be used to ensure adequate uptake or  
401 dose of the environmental strategies

## 402 8.2 Measurement of cost-effectiveness

403 We will conduct a within-trial analysis that directly compares incremental costs and maintenance of  
404 weight loss using data measured in the trial. The principal analyses will compare over 18 months the  
405 incremental cost effectiveness ratios estimated from the incremental costs and effects between each of  
406 the individual arms and the control group as well as the combined intervention versus each individual  
407 arm. The analysis will be from the employer perspective, as the employer faces the decision as to  
408 whether to implement this program. Secondary analyses will evaluate the same incremental cost-  
409 effectiveness ratios but: 1) use data following 6 months of post-intervention follow-up (24 month visit);  
410 2) use data at 12 months, a common follow-up interval in employee health programs; and 3) use the  
411 limited social perspective (because participant costs are crucial to understanding the full economic  
412 impact of interventions). Measurement of cost: For the employer perspective, measured costs will  
413 include: 1) incentive payments; 2) administrative costs of providing the interventions; and 3) medical  
414 expenditures. For the limited social perspective, measured costs will include 1) the costs included  
415 in the employer's perspective, 2) exercise costs, and 3) costs of nonstudy counseling services. This  
416 social perspective is limited in that we include incentive payments (which are transfers and typically  
417 omitted from the social perspective) and federal fee schedules to cost out medical services (as a proxy  
418 for social opportunity cost). Service use already documented in the study: Many of the services that will  
419 be costed out are already being measured in the clinical case report forms detailing participant  
420 adherence to daily feedback, lottery winnings, attendance and participation, dietary behavior, and  
421 physical activity. Project personnel diaries: Project personnel will complete time-diaries quarterly  
422 detailing their time spent on administrative tasks in the past week including time administering all  
423 participant related aspects of the intervention and usual care (excluding time related to general project  
424 administration). These tasks will be itemized by type of activity. They will also record the number of  
425 participant contacts by type of activity. Using personnel wages, these dairies will be used to estimate  
426 unit costs of administrative contacts. Elements of cost: 1) Incentive payments. Incentive payments to  
427 participants will be computed directly from the amount of incentive paid in the trial. The costs will  
428 include the daily lottery payments and the direct payments. 2) Administrative costs of program: The  
429 administrative costs of the incentive and environmental strategies interventions will include those for  
430 maintaining account balances, mailing payments and conducting follow-up visits, and other costs such as  
431 the scales used to weigh the participants. We will include project personnel costs by measuring the

432 average time required for project personnel to conduct specific intervention-associated administrative  
433 tasks as opposed to general project/ evaluation administration using personnel wages to convert this  
434 administrative time to costs.

435

### 436 8.3 Key Inclusion Criteria

437 Eligibility Criteria: Men and women  $\geq 18$  yrs. of age who are full-time or part-time employees at SEPTA,  
438 IBC, or the City of Philadelphia; who have a BMI of 30 to 55 kg/m<sup>2</sup>. (the upper limit of BMI will minimize  
439 the influence of outliers on the main result of weight loss). Participants must also have at least one  
440 other cardiovascular risk factor (high blood pressure, hypercholesterolemia, diabetes, smoking), which  
441 will be obtained by self-report. Participants must receive their health benefits from Independence Blue  
442 Cross; one of our partners in the study.

### 443 8.4 Key Exclusion Criteria

444 Exclusion criteria will be limited to factors that may confound results or that make participation in a  
445 weight loss program unfeasible, unsafe, or require more intensive monitoring, as detailed in our prior  
446 work. These exclusions include: unstable heart disease, uncontrolled hypertension, kidney disease, and  
447 other serious chronic illness (e.g., transplant recipient, terminal illness); substance abuse; bulimia  
448 nervosa or related behaviors; or diabetes medication other than metformin; pregnancy or breast  
449 feeding; contraindications to counseling about diet, physical activity, or weight reduction; unstable  
450 mental illness. Participants with diabetes on medications besides metformin are excluded because  
451 these medications may require adjustment during weight loss to prevent hypoglycemia and  
452 dehydration. Individuals unable to read consent forms or fill out surveys in English will be excluded.

## 453 9. Subject Recruitment

### 454 9.1 Target Population

455 For this study we are collaborating with 3 important community partners in Philadelphia: SEPTA  
456 (which runs public transit in Philadelphia); IBC, the region's largest insurer; and the City of  
457 Philadelphia, the largest employer in Philadelphia. Each of these entities has a large number of  
458 employees (9,200 SEPTA; 4,500 IBC; and 5,300 City of Philadelphia) with a high degree of obesity  
459 (estimated 55% SEPTA, 36% IBC, 42% City); and a high proportion of African Americans (56.6% SEPTA,  
460 38.4% IBC, 50% City). Eligible participants will be men and women above age 18 who are full-time or  
461 part-time employees at SEPTA, IBC, or the City of Philadelphia who have a BMI of  $\geq 30$  to  $\leq 55$  kg/m<sup>2</sup>.  
462 Participants must also have at least one other cardiovascular risk factor (high blood pressure,  
463 hypercholesterolemia, diabetes, smoking), which will be obtained by self report.

464

### 465 9.2 Accrual

466 There are an estimated 4,800 employees from the Southeastern Pennsylvania Transportation Authority  
467 (SEPTA), Independence Blue Cross (IBC), and the City of Philadelphia who have BMI greater than 30 and  
468 1 or more cardiovascular risk factor, of whom approximately 48% are black. We plan to enroll 328  
469 participants over 6 months making our recruitment targets easily attainable given the size of the  
470 recruitment pool.

### 471 9.3 Subject Recruitment

472 With assistance from IBC, SEPTA, and the City Department of Public health, we will advertise this as a  
473 research study of different ways to help people lose and keep off weight. The initial outreach to  
474 employees will be facilitated by IBC, SEPTA, and the City of Philadelphia, utilizing their existing  
475 communication channels (e.g. letter mailings, email, text, intranet, flyers, posters, digital display in the  
476 workplace). All recruitment materials will be submitted to the IRB before any study activities occur.

477 Interested participants will be asked to go to the Way to Health (WTH) website for prescreening and  
478 eligibility ascertainment. The screening intake form will be completed using the WTH website  
479 supplemented by phone support as needed. In order to verify BMI eligibility for the study, a verified in-  
480 person weight measurement will be required during the screening process.

#### 481 Recruitment at Independence Blue Cross site (IBC):

482 After initial outreach by IBC's communication channels, individuals will be asked go to the  
483 Way to Health (WTH) website for prescreening and eligibility ascertainment. In collaboration with IBC,  
484 the research study team will have a table set up at the IBC site during their annual biometric screening  
485 event. For IBC employees who previously completed online pre-screening and consent, the research staff  
486 will obtain individuals' weight measurement from their biometric screening. For  
487 IBC employees who did not complete the online pre-screening and consent prior  
488 to the biometric screening event, verbal consent will be obtained (similar to phone  
489 screening) to record their weight measurement from the biometric screening in order to  
490 determine BMI eligibility for the study.

491 For IBC employees who are interested in the study but did not attend the biometric screening event, in-  
492 person weight measurements will be obtained on site by the Fitness Director at IBC's MediFit Fitness  
493 Center. For these IBC employees, informed consent will have been obtained (online) in advance of the  
494 in-person weight measurements. Specific language is outlined in the consent form reflecting this  
495 method of in-person weight measurements for IBC employees. Individuals weight data will be  
496 transferred to the research team via SecureShare; a web-based application used by the University of  
497 Pennsylvania for secure file exchange

498

499

#### 500 Recruitment at SEPTA site:

501 After initial outreach by SEPTA’s communication channels, individuals will be asked go to  
502 the Way to Health (WTH) website for prescreening and eligibility ascertainment. In-person weight  
503 measurements will then be obtained at the SEPTA medical department by the research study staff, and  
504 also by the SEPTA nurse. The SEPTA nurse is also the main point-of-contact working with the research  
505 team for this study. The SEPTA nurse will obtain in-person weight measurements only on an as needed  
506 basis in the event research staff is not available to be on-site.

507 In-person weight measurements at the City of Philadelphia (CoP) site:

508 After initial outreach by the City of Philadelphia’s communication channels, individuals  
509 will be asked go to the Way to Health (WTH) website for prescreening and eligibility ascertainment. In-  
510 person weight measurements will then be obtained at the CoP site by the research study staff.

511

#### 512 9.4 Subject Compensation

513 To enhance retention, we will provide participants a total of \$250 for completing follow-up visits.  
514 Participants will receive \$50 for completing weights at the screening baseline visit and at follow-up visits  
515 at 6, 12, 18, and 24 months regardless of weight. This strategy has minimized differential drop out in our  
516 previous studies. (For the lottery incentive payments, please refer to the 'Design of the Incentives'  
517 header in the Procedures section of this application)

518

### 519 **10. Study Procedures**

#### 520 Consent Process

##### 521 10.1 Overview

522 Upon the initial outreach, individuals who are interested in learning more about the study will be  
523 directed to the Way to Health web portal. Upon reaching the portal, participants will complete a  
524 screening intake form to determine their eligibility. If participants are interested in participating, the  
525 Way to Health portal will take them through an automated online written informed consent session. The  
526 consent session will be divided into sections and potential participants will have to click a button to  
527 advance through each section. This is to help ensure that participants read the consent form thoroughly  
528 by breaking down the form into manageable blocks of text. Each section will have a button allowing the  
529 user to contact a researcher via email if she has questions about the consent form. Successive screens  
530 will explain the voluntary nature of the study, the risks and benefits of participation, alternatives to  
531 participation, and that participants can cease to participate in the study at any time. On the final  
532 consent screen, potential participants who click a clearly delineated button stating that they agree to  
533 participate in the study will be considered to have consented to enroll. Participants will then be  
534 randomized to one of the four arms by the web application. The participant will be led through an  
535 automated description of the details specific to that arm. After receiving such information, participants

536 will be asked to confirm that they understand and wish to continue. Participants will be able to contact  
537 the research staff if they have any questions about their assigned condition before they proceed to the  
538 next step. Participants will be provided with details regarding how to contact the research team via  
539 email or phone at any time if they subsequently wish to withdraw from the study. This contact  
540 information will remain easily accessible via the subjects individual Way to Health web portal  
541 dashboards throughout the study.

542 Procedures

#### 543 10.2 Baseline pre-treatment assessment for patients

544 Individuals who meet study entry criteria and have provided consent online will complete an intake  
545 survey measuring their health history, dietary intake, exercise habits, and previous weight loss efforts,  
546 and selected psychosocial variables shown to predict weight loss participation and success.

#### 547 10.3 Randomization

548 Randomization: The study statistician will randomize study participants at study inception using a  
549 random number generator and permuted block randomization with variable block sizes to force balance  
550 among treatment group assignments; variable block sizes will preclude prediction of treatment  
551 assignments by study staff. The statistician will randomize in a 1:1 ratio for each intervention compared  
552 to control and will stratify by: (1) the employer site; (2) sex, and (3) degree of obesity at baseline (BM  
553 30-37.9 and 38-55 kg/m<sup>2</sup>), as baseline BMI may moderate treatment effects. Following randomization,  
554 the study coordinator will provide instructions about the control, incentive, or environmental arms.

#### 555 10.4 Environmental Change Strategies

556 The environmental change strategy arm will involve a menu of promising or evidence-based  
557 environmental change strategies to promote healthy eating and physical activity, delivered through  
558 print, website-based and mobile communication channels to employees assigned to the Environmental  
559 and Combined arms of the trial. The strategies have been identified through systematic literature  
560 reviews, through Dr. Glanz' previous intervention studies, and from discussions with collaborators  
561 working on novel environmental change strategies. The planned environmental change strategies are  
562 based on our preliminary assessment and discussions with the participating worksite informants  
563 during the development of this proposal and are circumscribed by the context of these urban worksites  
564 and the structure of their employees work activities. The interventions are targeted at individual  
565 employees rather than work groups, due to the inclusion criteria (i.e., obese employees with at least one  
566 other CVD risk factor), feasibility considerations (individual rather than group randomization, total  
567 resources available), and the potential for translation, scalability and dissemination. As in many urban  
568 worksites, there are no in- house cafeterias but employees have access to lunchrooms for limited food  
569 and beverage preparation and storage (refrigerators, microwave ovens, vending machines) and are  
570 located near numerous food sources (restaurants, quick-serve or fast-food restaurants, lunch trucks,  
571 snack bars). Also, these worksites do not have fitness facilities on-site but have ample access to



572 stairways, neighborhood gyms, and walking routes and parks within a 5-10 minute walk of their  
573 worksites.

574 Healthy eating environmental change strategies will be designed to guide participants in identifying  
575 environmental influences on excess food intake and making environmental modifications easier for  
576 them to implement in their worksites, in the area around worksites, and in their homes. At the worksite,  
577 the strategies will emphasize identifying healthy vending options, healthy snack access, social  
578 environment change, and establishing healthy catering policies for work-based events. In the  
579 neighborhood near the worksite, strategies will include tools to help workers find healthy choices easily  
580 at restaurants and periodic promotions (arranged with vendors) to encourage trying new healthful  
581 prepared foods. Home environment changes will be guided by the Home Food and Activity Environment  
582 Audit tool, originally developed for research conducted by Dr. Glanz and colleagues at the Emory  
583 Prevention Research Center and recently adapted for an urban, low-income community intervention.  
584 Physical activity environment change strategies will also include strategies for worksites, near worksites,  
585 and in homes. At the worksites, strategies will include individually-delivered prompts to use stairs,  
586 standing desks, and walking breaks. In the area near worksites, strategies will include guidance on safe,  
587 convenient walking routes, link to benefits for incentives toward gym memberships, and safe bicycling  
588 paths. The Home Food and Activity Environment Audit will address physical activity environments in  
589 homes. Environmental strategies will be communicated to participants in the Environmental and  
590 Combined study arms twice weekly during the first 6 months, and weekly during months 7-18.

591 They will be varied to maintain interest and offer a variety of approaches that participants can use. The  
592 Way to Health platform will be programmed to send links to web and mobile intervention information,  
593 and to prompt participants who wish to have hard copy/paper copies of intervention materials. One  
594 week after a strategy tool is distributed, a simple log will be provided for participants to indicate their  
595 liking for, and use of, the various strategies. All participants in each of the three intervention arms will  
596 also receive a free wireless scale (value \$110) as this will be used to both obtain weights and provide  
597 participants with feedback. We are not providing these scales to participants in the usual care arm  
598 because that would not be consistent with usual care. Usual care: Employees of IBC, SEPTA, and City of  
599 Philadelphia are all offered the same wellness program that consists of: (1) yearly biometric screenings  
600 for which members receive incentives to participate; (2) reimbursements for fitness and weight  
601 management program participation (up to \$150 per year for documentation of 120 workouts and up to  
602 \$150 for documentation of participation in Weight Watchers); (3) Eat Right for Life educational program  
603 which includes onsite seminar and workshop materials; (4) six visits with a registered dietician as part of  
604 health benefit; (5) free use of WebMD tools - members biometric data is uploaded or self-reported and  
605 tools are available to the member to set goals and track progress.

606 Psychological research has identified social support as a factor that can help support weight loss. In an  
607 effort to strengthen the social support environment for participants in the environmental strategies and  
608 the combined incentives and environmental strategies arms, we will create a "secret" Facebook group  
609 where participants in these arms will be encouraged to provide support and seek support from one  
610 another. We will encourage wall posts of text, healthy recipes, pictures related to nutrition, physical

611 activity and the environment. The research study team will periodically post helpful links or tips that  
612 participants can use to improve their nutrition and physical activity environment.

613 Language added to the latest version of the informed consent document states that we will ask  
614 participants assigned to some arms (who wish to join a voluntary Facebook group) to provide us with  
615 their Facebook e-mail address. Participants will be asked to provide us with their Facebook e-mail  
616 address by completing a single question survey on their personal account page on the Way to Health  
617 platform. Preceding the survey will be a Facebook addendum to the consent explaining more in depth  
618 details of participation in the Facebook group. Participants will be informed here that they can view and  
619 print a version of the Facebook addendum from their personal Healthy Weigh account page at any time.  
620 This form will also direct participants to view the “study instructions” section of their dashboard content  
621 for more specific information on how to locate one’s Facebook e-mail address, how to create a  
622 Facebook account, and how to accept our Facebook invitation. If participants do not have a Facebook  
623 profile, or choose not to provide us with this information, they may still participate in the study. This will  
624 be notated in the Way to Health dashboard content and on the Facebook addendum. We will invite  
625 participants in the environmental strategies arms to join the group called “Healthy Weigh,” via the  
626 Facebook e-mail address that they provide through the single question survey. Participant identity will  
627 only be revealed to other enrolled subjects in the environmental strategies arms if a participant decides  
628 to join the Facebook group. If a participant declines, they will remain anonymous.

629 The privacy type for the group will be “Secret.” This means that only research staff will have control over  
630 who joins the group. Only current or former group members, people who were in the group but left,  
631 can see the group’s name. No one outside of the study will be able to locate, view or join the group  
632 without an invitation from the study team. Only current members can see who else is in the group.  
633 Only current and former members can see group activity. Only current members can post in the group.  
634 Only current and former members will be able to find the group in a search. Only current members can  
635 see stories about the group on Facebook (in the News Feed and search).

636 The research study team will closely monitor Facebook group activity in order to ensure that all activity  
637 occurring with the group is appropriate and related to the study. If an inappropriate post is made the  
638 research study team will promptly remove the post, and will contact the participant who made the post  
639 to review the purpose of the group and to review with the participant which types of posts are  
640 appropriate for the purposes of the research study. Inappropriate posts are any posts that do not relate  
641 to weight loss, social support, nutrition, physical activity, or the environment.

642 We intend to analyze the Facebook activity of participants within the Facebook group in order to  
643 determine: how many and which participants opt to join the group; how many posts, likes, and  
644 comments each participant makes during the study period; and whether the amount or nature of  
645 Facebook group activity corresponds with weight loss success. We also plan to look qualitatively at the  
646 nature of the posts, likes and comments of participants. No data analysis will be conducted until the  
647 end of the intervention. Data will be transcribed directly from Facebook into an excel sheet for tracking  
648 and organization of participant activity. This task will be completed by the research study personnel.  
649 The excel sheet will be stored in a password protected file on the secure/firewall servers of the PMACS

650 Data Center, in data files that will be protected by multiple password layers. These data servers are  
651 maintained in a guarded facility behind several locked doors, with very limited physical access rights. An  
652 additional amendment will be forthcoming, which will explain the detailed data analysis process.

653

654 Outcome assessments: Weight for all participants will be ascertained on enrollment in the study and  
655 then at the end of Phase I (6 months), at 12 and 18 months (end of Phase II), and at 24 months (end of  
656 Phase III). The primary outcome will be change in weight from baseline to 18 months. We will utilize  
657 other measures collected at months 6, 12, 18 and 24 as part of routine biometric assessments by the  
658 participants' employers, all of whom share the same insurance carrier, Independence Blue Cross (IBC).

659

660

#### 661 10.5 Design of the Incentives

662 The incentive programs incorporate key aspects of optimal design, including objective and reliable  
663 confirmation of behavior change at specified intervals (weight measurement), reinforcement of the  
664 target behavior (weight maintenance) with non-drug reinforcers (incentives), large payments to  
665 reinforce the target behavior, and intermittent reinforcement. All incentive participants will receive  
666 daily feedback for 18 months; they will be given an electronic scale (accurate to  $\pm 0.2$  lbs) and given a  
667 weight loss goal for the first 6 months of 0.5 lb a week. At the beginning of Phase II and each month  
668 from months 7-18 they will be asked to set a goal of either maintaining weight loss or losing further  
669 weight (e.g. choice will be either 0, 0.5 pounds per week, with a default of 0 pounds if nothing is  
670 chosen). Inviting people to set more ambitious goals than maintenance is based on evidence that people  
671 often voluntarily commit to more ambitious goals than would be economically rational and this  
672 commitment can help them achieve those goals.

673 Each month we will provided each study participant with a graph on the web portal that shows a line  
674 beginning at their current weight and dropping to their target weight over the remaining months of  
675 Phase I (see Figure 4 in grant proposal, which presents a sample weight loss line for a participant who  
676 begins Phase I at 250 lbs and sets a one pound per week weight loss goal over 6 months ideal weight  
677 loss trajectory and fresh start trajectory described below.). Participants will self-monitor weights daily.  
678 Each morning before eating or drinking and after urinating, participants will weigh themselves and their  
679 weights will automatically be transmitted by the Withings Scales to the Way to Health system.

680 Participants will then receive automated feedback from the system (they may choose text or email)  
681 on their progress relative to their goals and their potential earnings, helping to make the payments feel  
682 immediate. They will be told that they will receive the full amount if they meet the 6 month target for  
683 their weight (the sum of the monthly weight loss goals) but half the money if they do not. Daily  
684 monitoring provides participants with a frequent reminder of their goals, chosen because people tend to  
685 adopt a narrow frame of reference to diets, rededicating themselves each day. Daily weigh-ins should

686 reduce binge eating by making participants constantly accountable for their weight. Monthly graphical  
687 feedback provides encouragement and a symbolic reward for slow and steady progress. Participants in  
688 the lottery arm will be eligible for a daily lottery prize with an expected value of \$3.00/day if, prior to  
689 resolution of the lottery, they reported a weight at or below their goal on the ideal weight loss trajectory  
690 in Figure 4. The lottery provides both infrequent large payoffs (a 1 in 100 chance at a \$100 reward) and  
691 frequent small payoffs (a 1 in 5 chance at a \$10 reward) since subjects are motivated by both the future  
692 (fixation on large potential winnings) and the past (how often did I win?). Subjects will be assigned a 2-  
693 digit number with two distinct digits upon entry into the study, e.g. 27. A two digit random number will  
694 be generated for each day. If the last digit includes either a 2 or 7 (a 1 in 5 chance), and the subject  
695 reported a weight at or below target weight, s/he wins \$10. If the two digits are 27 (a 1 in 100 chance)  
696 the subject wins an additional \$100. When a subject reports a weight above target, we will still generate  
697 a 2- digit daily number and tell the subject if s/he would have won the lottery that day if s/he had  
698 reported a weight at or below target. We believe that a desire to avoid the regret associated with not  
699 winning combined with learning that one would have won, had one been adherent, will motivate  
700 participants to a greater degree than only on the value of the rewards. A key aspect of the weight loss  
701 trajectory is that it can be reset monthly, a critical feature in the likely event that a participant falls short  
702 of attaining a monthly weight loss goal. To avoid discouraging such subjects, who would otherwise  
703 suddenly have to lose a lot of weight to get back on track and might decide to drop out of the study,  
704 each participant will be given the opportunity for a fresh start. The overall goals set at beginning of  
705 Phase I will stay the same, but the slope of the trajectory will adjust (i.e., steepen) such that the  
706 participant need not binge diet following a month of poor weight loss performance (see Fresh start  
707 trajectory in Figure 3, for a subject who lost 1 lb. instead of 4 lbs. in first month). Keeping the overall  
708 weight loss goal constant makes the procedure fair for participants who maintain the ideal trajectory,  
709 while adjusting the slope of the weight loss line allows for recovery from slip-ups, an approach we have  
710 used to attain minimal lost to follow-up rates of less than 10% in previous weight loss studies. To give  
711 participants frequent feedback, we will pay out 50% of winnings to date at the end of each month. To  
712 minimize falsification of weights and to utilize the amplification of motivation provided by loss aversion,  
713 the other half will be held in a virtual account and paid to participants at the end of each 6 month period  
714 only if they have met or exceeded their monthly goal. Between months 19-24 (Phase III), participants  
715 will not receive incentives tied to weight maintenance to evaluate sustainability of effects achieved in  
716 Phases I and II.

#### 717 10.6 Study Duration

718 The duration of participation for each individual participant is expected to be 2 years (24 months). We  
719 plan to recruit and enroll participants starting in April 2015, until June 2015 (over a three month time  
720 period). We expect the total duration of the study to last 5 years (60 months) for the completion of all  
721 three phases of the study.

#### 722 10.7 Dissemination

723 Findings from this research will be disseminated through incorporation into the wellness/benefits design  
724 for employees of City of Philadelphia, SEPTA, and IBC. Broader dissemination will include use in benefit

725 design approaches used for IBC throughout the region and more widely through collaborating  
726 organizations nationally, other employers, and health delivery organizations once findings are  
727 published.

## 728 **11. Analysis Plan**

### 729 11.1 Statistical Considerations

730 Descriptive analyses: We will produce data summaries regularly using frequencies for categorical  
731 variables and means, medians, and ranges for continuous variables. We will assess data quality and  
732 examine distributional assumptions with graphical methods. To evaluate balance among groups  
733 achieved by randomization, we will compare baseline values of all variables across the 4 arms using  
734 appropriate tests. General procedures: All primary analyses will be on an intent-to-treat basis including  
735 each participant in the group to which s/he was randomized, regardless of adherence to the assigned  
736 strategy. Given the high rates of missing data typical of weight loss studies, handling of missing data is  
737 an important issue. Primary analyses will assume that any participants for whom follow-up weight loss  
738 data are unavailable have had their weight return to baseline (weight at beginning of Pre Phase). Within  
739 each arm, this assumption is likely to be conservative but this may not be the case in inter-arm  
740 comparisons, depending on the dropout rates in the different arms and true follow-up weights of the  
741 dropouts. Thus, a key secondary analysis will consider the effect of differential dropout among the  
742 treatment arms. Specific analysis plans are described below. All hypotheses will be tested using two-  
743 sided, 0.05-level tests unless otherwise specified (notably the Tukey honest significant difference testing  
744 approach will be used for the three primary hypotheses in Specific Aims 1-3). Specific contrasts: Specific  
745 Aim 1. Assess the effectiveness of a daily lottery-based financial incentive, relative to the control group,  
746 on cumulative weight loss over an 18-month period. H1: Mean weight loss from baseline to 18 months  
747 among participants randomized to the lottery incentive will be at least 5 kg greater than among control  
748 group participants. The primary analyses will be unadjusted intent-to-treat analyses, using a t-test for  
749 differences between each intervention group and the control group in weight change between baseline  
750 and 18 months, applying the Tukey honest significant difference testing procedure. If weight change  
751 appears to be non-normally distributed, we will find an appropriate transformation or use the non-  
752 parametric Wilcoxon rank-sum test. Missing data will be handled by assuming that participants who are  
753 lost to follow-up have returned to their initial weight, i.e., using baseline weights for imputation. Weight  
754 change between baseline and 18 months, with 95% confidence intervals (CIs), will be estimated for  
755 comparison with adjusted analyses. We will also estimate regression models adjusted for the  
756 stratification variables (sex, employer, initial BMI) and other demographic factors including race,  
757 income, and education. If there is evidence of confounding using change in estimate criterion, we will  
758 use multivariable linear regression models to compute adjusted estimates of difference in weight  
759 change between 0 and 18 months between the arms, with 95% CIs. We will fit exploratory models of the  
760 repeated weight measurements that incorporate time as a polynomial function or using visit-specific  
761 indicator variables to determine the most parsimonious model that adequately describes the observed  
762 patterns. We will investigate random-effects models that allow for baseline individual variability as well  
763 as variability in the changes in weights over time; an example is the following:  $E(\text{weight}_{ij}) = \mu + \alpha_j + \beta_j \text{Time } j + \gamma_j \text{Group } i + \epsilon_{ij}$ , where  $i$  indicates subject,  $j$  indicates assessment times, the

765 parameters are fixed effects linking time, a treatment group vector, and a vector of other  
766 demographic or clinical covariates  $X_i$  to the outcomes, and  $b_{0i}$  and  $b_{1i}$  are random intercept and slope  
767 effects. Tests for significance of random effects will use likelihood ratio tests for nested models; we will  
768 compare models with different random effects structures using the maximized log-likelihoods and the  
769 Akaike Information Criterion (AIC). We will apply standard diagnostic techniques to assess model  
770 adequacy. We will use treatment by time interactions to assess whether the rate of change in weight  
771 differs by intervention arm. We hypothesize that incentives may be more effective among lower income  
772 individuals and will evaluate this using interaction terms of income with treatment group. We will  
773 explore differential effects by race and education and baseline levels of intrinsic motivation and stages  
774 of change. To assess the sensitivity of treatment effect estimates to missing data, we will fit hierarchical  
775 or mixed effects models with and without accounting for informative missing data. Specific Aim 2:  
776 Assess the effectiveness of environmental strategies, relative to the control group, on cumulative weight  
777 loss over an 18-month period. H2: Mean weight loss from baseline to 18 months among participants  
778 randomized to the environmental strategies group will be at least 5 kg greater than among control  
779 group participants The analysis will proceed similar to the analysis of Specific Aim 1. Specific Aim 3.  
780 Assess the effectiveness of the combined incentives and environmental strategies arm, relative to the  
781 control group, on cumulative weight loss over an 18-month period. H3: Mean weight loss from baseline  
782 to 18 months among participants randomized to the combined arm will be at least 8 kg greater than  
783 among control group participants. The analysis will proceed similar to the analysis of Specific Aims 1 and  
784 2. Specific Aim 4. Assess the comparative effectiveness of lottery-based incentives and environmental  
785 strategies on cumulative weight loss over an 18-month period. H4: Mean weight loss among  
786 participants randomized to the combined arm will be at least 3 kg greater than among participants in  
787 either of the individual active arms. The analysis will proceed similarly to the analysis of Specific Aims 1-  
788 3 Specific Aim 5: Assess the costs of each of the intervention arms from both the employer and social  
789 perspective and compare the cost differences between each arm relative to the effectiveness measured  
790 by incremental weight loss achieved. H5: From an employer's perspective, all intervention arms will be  
791 cost-effective relative to the control group but the combined arm will be the most cost effective. The  
792 principal incremental cost-effectiveness ratios between intervention and control arms will be from the  
793 employers perspective and compare costs during the intervention from baseline to 18 months per unit  
794 change in weight. Secondary analyses will 1) evaluate this same ratio but use either 6 months post-  
795 intervention data (24 month visit) or 12 months of intervention data (12 month visit) and 2) evaluate  
796 these 2 ratios using a limited social perspective. Cost models will use a generalized linear model with a  
797 log link and gamma family. Missing data strategies will parallel those described above. We will assess  
798 sampling uncertainty for the comparison of costs and effects by calculating parametric 95% CIs for the  
799 cost per kg lost and acceptability curves. Standard errors and correlation of the difference in cost and  
800 effect will be derived using a bootstrap procedure.

## 801 11.2 Power and Sample Size Considerations

802 We have designed the study with adequate power to detect differences in weight loss over an 18-month  
803 period. Our intervention should achieve its maximal impact in maintaining initial weight loss at the end  
804 of Phase II (month 18), when the incentive payments cease. To maintain the experiment-wide Type I

805 error and guard against false conclusions of effectiveness, we use the Tukey honest significant  
806 difference approach which maintains power to show significance of at least one of the three primary  
807 comparisons (each intervention relative to control) and at least one of the secondary comparisons (the  
808 combined group relative to each of the two interventions alone). If the interventions are as effective as  
809 expected, we will have 90% power to detect the improvement in our primary outcome in at least one  
810 intervention group compared to control. We plan to recruit approximately one third of the 328  
811 participants required for the start of Phase I from each of our participating employers (IBC, SEPTA, and  
812 City of Philadelphia). Given the large number of potentially eligible employees, we can, if needed, easily  
813 increase the proportion of participants from any of these employers to meet recruitment targets. The  
814 328 participants will be randomized to our 3 intervention groups and the control group using a 1:1 ratio  
815 for the intervention arms. We have built in a margin of 20% for potential attrition before the 18- month  
816 assessment, resulting in 260 participants (65 per arm) who are available for analysis at the end of Phase  
817 II. This will provide us with 90% power to detect a difference in weight change between baseline and the  
818 18-month weigh-in of 5 kg between each intervention group and the control group and 3 kg between  
819 the combined group and either the incentive or environmental strategies groups. Sample size/ power  
820 analysis. Primary outcomes. Specific Aims 1-3: Compare effectiveness of financial incentive,  
821 environmental strategy, and combined arm to control during Phases I and II For expected weight change  
822 between months 0-18 of -8 kg, -5 kg and 0 kg in the combined, intervention and control groups,  
823 respectively (a net difference between single intervention and control groups of 5 kg and between  
824 combined intervention and control groups of 8 kg) and assuming a standard deviation (S.D.) of weight  
825 loss of 5 kg, 65 participants per group provide 90% power to detect at least one of these contrasts. The  
826 sample size provides 80% power to detect a difference of 4.6 kg in weight change between single  
827 intervention and control groups and 7.3 kg between the combined and control groups. Specific Aim 4:  
828 Compare effectiveness of financial incentives and environmental strategies and combined arm during  
829 Phases I and II This test is powered like Specific Aims 1-3 but designed to detect a smaller difference,  
830 taking advantage of the Tukey approach; the sample size of 65 per arm provides 90% power to detect a  
831 difference of 3 kg and 80% power to detect a difference of 2.7 kg. Secondary outcomes. Specific Aim 5:  
832 Compare the cost differences between each arm relative to the effectiveness measured by incremental  
833 weight loss achieved. We will calculate a point estimate of cost per kg of weight loss based on  
834 estimated inter-arm differences in weight loss and the incremental cost of the interventions, as  
835 described in C.3.d.ii.c. For weight loss at 18 months, given an expected incremental cost of \$810  
836 (incentives) and incremental weight loss of 5 kg, 328 participants provide 80% power to detect a cost  
837 per kg lost of \$430 and greater than 90% power to detect a cost per kg lost of \$575. This study is  
838 primarily a test of the efficacy of these interventions. Due to resource constraints and because we do  
839 not yet know about intervention effectiveness, we did not power this study based on cost effectiveness  
840 analyses. Estimated detectable costs per kg are a function of wide confidence intervals due to sample  
841 size.

#### 842 11.3 Measurement of effect:

843 The goal of this analysis will be to assess relative weight loss in the intervention arms relative to control.  
844 For the principal cost-effectiveness analysis, measurement of incremental weight loss will be based

845 on differences in weight between baseline and the 18 month visit; in secondary analyses it will be  
846 based on weight differences between baseline and 24 months and baseline and 12 months.

## 847 **12. Human Research Protection**

### 848 12.1 Subject Confidentiality

849 Each participant will be assigned a unique, numeric identifier which will be used on all collected study  
850 information. The source document in which the unique identifier is associated with personal  
851 information will be stored in a password protected computer file to which only study personnel have  
852 access. All data will be stored on the Way to Health web-based platform database. Threats to  
853 confidentiality will be minimized by careful data collection and the private and secure web-based  
854 platform. At the conclusion of the study, all identifying information will be destroyed and all data will be  
855 archived in a password protected folder. The web application for this study will use account-based  
856 authentication and permission systems to protect confidentiality. An investigator or statistician who logs  
857 in will be able to access only de-identified data. Only research staff will be responsible for contacting  
858 participants for study related activities (responding to questions about the study) will be able to view  
859 participant names and contact information. All of these personnel will have completed research and  
860 confidentiality (CITI) training. The system will automatically generate logs of all data queries, and these  
861 will be reviewed weekly by research staff to ensure that no unauthorized persons have gained access to  
862 identifiable information. We will implement multiple, redundant protective measures to guarantee the  
863 privacy and security of the participant data. All investigators and research staff with direct access to the  
864 identifiable data will be required to undergo annual responsible conduct of research, cybersecurity, and  
865 Health Insurance Portability and Accountability Act certification in accordance with University of  
866 Pennsylvania regulations. All data for this project will be stored on the secure/firewalled servers of the  
867 PMACS Data Center, in data files that will be protected by multiple password layers. These data servers  
868 are maintained in a guarded facility behind several locked doors, with very limited physical access rights.  
869 They are also cyber-protected by extensive firewalls and multiple layers of communication encryption.  
870 Electronic access rights are carefully controlled by University of Pennsylvania system managers. We  
871 will use highly secure methods of data encryption for all transactions involving participants  
872 financial information using a level of security comparable to what is used in commercial financial  
873 transactions. We believe this multi-layer system of data security, identical to the system protecting the  
874 University of Pennsylvania Health Systems medical records, greatly minimizes the risk of loss of privacy.  
875 All study-related emails will be sent to non-work based email addresses. Research material will be  
876 obtained from participant surveys, and the wireless scales. All participants will provide informed  
877 consent for access to these materials. Research material that is obtained will be used for research  
878 purposes only. The same procedure used for the analysis of automated data sources to ensure  
879 protection of individuals' information will be used for the survey data, in that individual identifiers will  
880 be used only for linkage purposes or to contact individuals. The study identification number, and not  
881 other identifying information, will be used on all data collection and contained in these databases. All  
882 study staff will be reminded to appreciate the confidential nature of the data collected and contained  
883 in these databases. The UPenn Biomedical Informatics Consortium (BMIC) will be the hub for the  
884 hardware and database infrastructure that will support the project and where the Way to Health web



885 portal is based. The BMIC is a joint effort of the University of Pennsylvania's Abramson Cancer Center,  
886 the Cardiovascular Institute, the Department of Pathology, and the Leonard Davis Institute.

## 887 12.2 Subject Privacy

888 Privacy refers to the person's desire to control access of others to themselves. Privacy concerns people,  
889 whereas confidentiality concerns data. Describe the strategies to protect privacy giving consideration to  
890 the following: The degree to which privacy can be expected in the proposed research and the safeguards  
891 that will be put into place to respect those boundaries. The methods used to identify and contact  
892 potential participants. The settings in which an individual will be interacting with an investigator. The  
893 privacy guidelines developed by relevant professions, professional associations and scholarly  
894 disciplines (e.g., psychiatry, genetic counseling, oral history, anthropology, psychology).

895 With assistance from IBC, SEPTA, and the City of Philadelphia, we will advertise this as a research study  
896 of different ways to help people lose and keep off weight. The initial recruitment outreach will be  
897 facilitated by IBC, SEPTA, and the City of Philadelphia, utilizing existing communication channels (as  
898 described in the recruitment section). Interested participants will be asked to go to the Way to Health  
899 (WTH) website for prescreening and eligibility ascertainment. Screening intake will be done using the  
900 WTH website supplemented by phone support as needed, with the final step being confirmation of  
901 weight by validated employee biometric assessment data (within 4 weeks), or through participants  
902 physicians (documentation provided from the patient's outreach to their physician). During the  
903 screening intake on the WTH website, we will collect subjects names, addresses, email addresses, phone  
904 numbers, height and weight, medical history, sociodemographic data, social security numbers, and  
905 employees' biometric assessment data. All of these data will be stored in an encrypted database that  
906 conforms to applicable data security standards. Access to all such data will be limited to specifically  
907 designated research staff that will be responsible for contacting participants for follow-ups and  
908 responding to questions and concerns from participants. All communications between participants and  
909 the study website will be encrypted with SSL/HTTPs technology. Social security numbers, bank  
910 account numbers and routing numbers for all persons to whom rewards are sent will be transmitted in  
911 encrypted format to Accounts Payable, who will store the data for W-9 forms. After the social security  
912 numbers are no longer needed they will be deleted from our system.

## 913 12.3 Protection of Human Participants:

914 Human subjects involvement and characteristics. For the proposed study, 328 subjects with a BMI of 30  
915 to 55 kg/m<sup>2</sup> and over the age of 21 who are full- time employees of SEPTA, IBC and the City of  
916 Philadelphia will be eligible for study. Eligibility will be determined from the study inclusion/exclusion  
917 criteria (Refer to inclusion/exclusion section of the protocol application). Exclusion criteria were limited  
918 to factors that may confound results or that make participation in a weight loss program infeasible,  
919 unsafe, or require more intensive monitoring. These exclusions include unstable heart disease,  
920 uncontrolled hypertension, kidney disease, and other serious chronic illness (e.g., transplant recipient,  
921 terminal illness). Patients with diabetes mellitus on hypoglycemic medication other than metformin will  
922 be excluded because medication adjustments and monitoring that they would require is beyond the

923 scope of this trial. Patients on diabetes or high dose diuretic medication are excluded because these  
924 medications may require adjustment during weight loss to prevent hypoglycemia and dehydration.  
925 Women who are pregnant or breastfeeding are excluded because their energy requirements are  
926 obviously different from other individuals. Substance abuse and unstable mental illness were chosen  
927 because adherence to the intervention may be disproportionately difficult in these individuals compared  
928 with other individuals. We will exclude temps or part-time employees because lost to follow-up rates  
929 over 24 months may be high. Persons with a history of bulimia nervosa-related behaviors are excluded  
930 because they may employ these behaviors to reach their weight goals. We will also exclude potential  
931 subjects who cannot or will not give consent. No subjects will be excluded on the basis of sex or race.  
932 There will be approximately equal representation of African-Americans and Caucasians and 30%-40%  
933 men based on our recruitment experience in previous weight loss clinical trials and the demographics of  
934 the employer populations.

935

936

#### 937 12.4 Cost-Effectiveness Analysis.

938 Participants will be asked to provide informed consent when enrolled in the research project after full  
939 explanation of the research project. For the cost- effectiveness analyses, we will not be using claims data  
940 so HIPAA authorization related to access to their medical charts will not be required. We will request  
941 access to all biometric data collected as part of employer wellness programs that study participants are  
942 part of. All participants will be over the age of 21. Women and minorities will be included.

#### 943 12.5 Sources of materials.

944 All research material obtained from study participants will be gathered prospectively and will include  
945 weight, and subjects responses to questionnaires. We will obtain biometric information through the  
946 participants employer as this information is already collected as part of the employee wellness program.  
947 In addition, research material that is obtained will be used for research purposes only.

#### 948 12.6 Potential Risks Involved in the Proposed Study.

949 There are minimal risks associated with providing lottery-based financial incentives and making  
950 environmental manipulations to encourage initial and maintenance of weight loss. The main risk is loss  
951 of confidentiality, which will be protected as described below. There are no potential risks associated  
952 with any other measures or data to be collected. During the consent process, we will inform subjects of  
953 the risks associated with loss of confidentiality.

#### 954 12.7 Risks Involved in the Cost-Effectiveness Analysis.

955 As stated above, the main risk is loss of confidentiality. The immediate benefits of this study for  
956 participants are minimal; however, as mentioned, so are the risks. Overall the risk to benefit ratio is  
957 highly favorable given the long term potential of this study to significantly contribute to our knowledge

958 of financial incentive and environmental strategies to combat obesity and their impact on health and  
959 health-related behaviors.

#### 960 12.8 Adequacy of Protection from Risks Recruitment and informed consent.

961 With assistance from IBC, SEPTA, and the City Department of Public Health we will advertise this study  
962 as a research study of different ways to help people lose and keep off weight. Potential participants will  
963 be told that some participants will also receive financial incentives, but this feature will not be  
964 advertised, lest subjects enlist primarily for that reason. Interested participants will be asked to go to the  
965 Way to Health (WTH) website or to contact study personnel by phone for prescreening and eligibility  
966 ascertainment. Intake will be done using the WTH website supplemented by phone support as needed.  
967 Enrollment will include a description of the voluntary nature of participation, the study procedures, risks  
968 and potential benefits in detail. The enrollment procedure will provide the opportunity for potential  
969 participants to ask questions and review the consent form information with family and friends prior to  
970 making a decision to participate. Participants will be told that they do not have to answer any questions  
971 if they do not wish and can drop out of the study at any time, without affecting their medical care or the  
972 cost of their care. They will be told that they may not benefit directly from the study and that all  
973 information will be kept strictly confidential, except as required by law.

#### 974 12.9 Protection against risk.

975 In the event of an adverse effect necessitating medical or professional intervention, referral to the  
976 study participants primary care provider or an appropriate specialist will occur. In emergency  
977 situations when a study participant contacts one of the research personnel first, the particular  
978 research staff member will either make contact with emergency personnel or advise the study  
979 participant to do so immediately and follow up with the emergency personnel to ensure communication  
980 of the study interventions and their associated risks. Participants will be queried for potentially relevant  
981 health status changes at each data collection visit throughout follow-up. Additionally, an independent  
982 DSMB will review the clinical data routinely with safety as its primary objective. No results will be  
983 reported in a personally identifiable manner.

#### 984 12.10 Electronic Data Security.

985 The same procedure used for the analysis of automated data sources to ensure protection of patient  
986 information will be used for the survey data, in that patient identifiers will be used only for linkage  
987 purposes or to contact patients. The study identification number, and not other identifying information,  
988 will be used on all data collection instruments. All study staff will be reminded to appreciate the  
989 confidential nature of the data collected and contained in these databases. The Penn Medicine  
990 Academic Computing Services (PMACS) will be the hub for the hardware and database infrastructure  
991 that will support the project and where the Way to Health web portal is based. PMACS provides a secure  
992 computing environment for a large volume of highly sensitive data, including clinical, genetic,  
993 socioeconomic, and financial information. Among the IT projects currently managed by PMACS are:  
994 (1) the capture and organization of complex, longitudinal clinical data via web and clinical applications  
995 portals from cancer patients enrolled in clinical trials; (2) the integration of genetic array databases and

996 clinical data obtained from patients with cardiovascular disease; (3) computational biology and  
997 cytometry database management and analyses; (4) economic and health policy research using Medicare  
998 claims from over 40 million Medicare beneficiaries. PMACS requires all users of data or applications on  
999 PMAC servers to complete a PMACS-hosted cybersecurity awareness course annually, which  
1000 stresses federal data security policies under data use agreements with the university. Curriculum  
1001 includes HIPAA training and covers secure data transfer, passwords, computer security habits and  
1002 knowledge of what constitutes misuse or inappropriate use of the server. We will implement multiple,  
1003 redundant protective measures to guarantee the privacy and security of the participant data. All  
1004 investigators and research staff with direct access to the identifiable data will be required to undergo  
1005 annual responsible conduct of research, cybersecurity, and Health Insurance Portability and  
1006 Accountability Act certification in accordance with University of Pennsylvania regulations. All data for  
1007 this project will be stored on the secure/firewalled servers of the PMACS Data Center, in data files that  
1008 will be protected by multiple password layers. These data servers are maintained in a guarded facility  
1009 behind several locked doors, with very limited physical access rights. They are also cyber-protected by  
1010 extensive firewalls and multiple layers of communication encryption. Electronic access rights are  
1011 carefully controlled by University of Pennsylvania system managers. We will use highly secure  
1012 methods of data encryption for all transactions involving participants financial information using a level  
1013 of security comparable to what is used in commercial financial transactions. We believe this multi-layer  
1014 system of data security, identical to the system protecting the University of Pennsylvania Health  
1015 Systems medical records, greatly minimizes the risk of loss of privacy.

#### 1016 12.11 Potential Study Benefits

1017 Potential Benefits of the Proposed Research to the Participants and Others Participants in this study will  
1018 benefit directly by receiving free health monitoring as well as weight management, nutrition, and  
1019 physical activity education. The benefits of weight loss are many; weight loss can result in  
1020 improvements in hypertension, hyperglycemia, dyslipidemia, arthritis, sleep apnea, and many other  
1021 obesity-associated conditions. More importantly, while the subjects themselves might not derive  
1022 benefit, knowledge gained from the study will assist in the treatment of others who are overweight or  
1023 who attempt weight loss by one of the methods studied.

#### 1024 12.12 Resources necessary for Human Research Protection

1025 The proposed research project will be conducted by a team based within an environment at the  
1026 University of Pennsylvania (UPENN) that provides substantial research experience, infrastructure  
1027 support, and expertise in areas important to this project. In particular, the Center for Health Incentives  
1028 and Behavioral Economics (LDI CHIBE) is one of 2 NIH-funded Centers in Behavioral Economics and  
1029 Health in the United States and has developed an NIH-funded infrastructure (the Way to Health) for  
1030 conducting behavioral interventions using a combination of wireless technologies and automated  
1031 feedback including participant payment of incentives and the Center for Health Behavior Research  
1032 (CHBR) has extensive community based research experience including work on environmental change  
1033 strategies. The team includes investigators experienced in obesity interventions, clinical trials, health  
1034 economics research, behavioral economics, and cost-effectiveness analyses. Dr. Kevin Volpp (Multiple

1035 PI) is an expert in behavioral economics and health and directs the Center for Health Incentives and  
1036 Behavioral Economics (CHIBE) and the NIA-funded Penn CMU Roybal P30 Center on Behavioral  
1037 Economics and Health. He is a Professor of Medicine at the Perelman School of Medicine and  
1038 Professor of Health Care Management at the Wharton School as well as an elected member of the  
1039 Institute of Medicine of the National Academy of Sciences. Dr. Karen Glanz (Multiple PI) is an expert in  
1040 the field of obesity research, nutrition, and physical activity behavior and interventions and is the  
1041 George A. Weiss University Professor of Epidemiology and Nursing at the University of Pennsylvania and  
1042 also an elected member of the Institute of Medicine; Dr. Pamela Shaw, a biostatistician experienced in  
1043 the design and analysis of weight loss intervention studies and an Assistant Professor of Biostatistics at  
1044 UPENN, will lead the statistical analyses; Dr. Will Yancy (consultant) is an expert in the design and  
1045 conduct of clinical trials of weight loss interventions and Associate Professor of Medicine at Duke  
1046 University School of Medicine. Dr. George Loewenstein (Consultant) is the Herbert A. Simon Professor of  
1047 Economics and Psychology at Carnegie Mellon University and a founder of the fields of behavioral  
1048 economics and neuroeconomics who has led or co- led both incentive and environmental interventions  
1049 to reduce obesity. We have successfully completed 4 weight loss RCTs using financial incentive  
1050 interventions as well as worksite and community intervention studies using environmental  
1051 strategies. We plan to enroll employees from the Southeastern Pennsylvania Transportation Authority  
1052 (SEPTA), Independence Blue Cross (IBC), and the City of Philadelphia. There are an estimated 4,800  
1053 employees from these entities who have BMI greater than 30 and 1 or more cardiovascular risk factor,  
1054 of whom approximately 48% are black.<sup>174</sup> We plan to enroll 328 participants over 6 months making our  
1055 recruitment targets easily attainable given the size of the recruitment pool. We have extensive  
1056 experience working with outside entities (Weight Watchers, CVS Caremark, Humana, Horizon Blue Cross  
1057 Blue Shield, Aramark are a few examples) and have enrolled thousands of participants in behavioral  
1058 economic interventions around the United States and always achieved our enrollment targets. All  
1059 senior/key personnel and research staff who will be involved in the design and conduct of the trial  
1060 have completed the mandated human subjects research certificate program. In addition, all staff  
1061 working on this study are required to carefully read the protocol and will be trained on all related  
1062 study procedures and information. The multiple PIs will be responsible for ensuring that project faculty  
1063 and staff have the equipment and training required to protect privacy and confidentiality and will  
1064 monitor and document that these individuals are properly certified. If new senior/key personnel and  
1065 staff become involved in the research, documentation that they have received the required education  
1066 will be included in the annual progress reports.

### 1067 **13. Data Protection**

#### 1068 13.1 Data and Safety Monitoring

1069 Individual-level data for participants will be kept confidential and will only be stored on highly secure  
1070 servers. Only authorized project personnel will have access to the data and the data will be stored on  
1071 servers only and not stand-alone PCs or laptops. All data will be reported at units of aggregation which  
1072 make it impossible the identification of individual subjects. However, because we are contacting  
1073 individuals after their initial enrollment, there is an obvious need to have data with identifiers and  
1074 contact information from the master enrollment files. Study personnel who work with these data will

1075 have undergone all of the required human subjects training. They will work with the data in password  
1076 protected files. The data and safety monitoring plan will have three parts. 1) PMACS will develop and  
1077 implement methods of verifying entered data and of quality control. 2) the PIs will be directly  
1078 responsible for identifying and reporting all serious adverse events, protocol deviations/violations and  
1079 unanticipated events to the IRBs and funding agency promptly, as appropriate. The PIs will also report all  
1080 adverse events, accrual rates, retention rates, and all other logistical issues to the DSMB (described  
1081 below) at least biannually (and more frequently if there are serious adverse events). 3) there will be a  
1082 data safety monitoring board (DSMB) responsible for monitoring the trial. Specifically, the multiple  
1083 principal investigators (PIs) and the IRB will be responsible for ensuring risks to human subjects are  
1084 minimized, risks are reasonable, subject selection is equitable, the research team has access to  
1085 adequate resources to conduct the study, the informed consent process meets regulatory and ethical  
1086 requirements, adequate provision is made to protect human subjects by monitoring the data collected  
1087 and there are adequate provisions to protect subject privacy per HIPAA regulations and confidentiality  
1088 of data. All senior/key personnel and research staff who will be involved in the design and conduct of  
1089 the study must receive education in human research subject protection from a training program that is  
1090 approved by a properly constituted independent Ethics Committee or Institutional Review Board. The  
1091 multiple PIs will be responsible for ensuring that project faculty and staff have the equipment and  
1092 training required to protect privacy and confidentiality and will monitor and document that these  
1093 individuals are properly certified. If new senior/key personnel and staff become involved in  
1094 the research, documentation that they have received the required education will be included in the  
1095 annual progress reports.

### 1096 13.2 Data and Safety Monitoring Board

1097 The DSMB will be composed of 3 experts, with expertise in clinical trials, obesity research, and  
1098 biostatistics, along with multiple PIs Drs. Glanz and Volpp as non-voting members. We consider the  
1099 proposed trial to be relatively low risk. Therefore, we plan to arrange for a monitoring committee that is  
1100 assigned to review the study and staff training protocols, monitor the trial for safety and adverse events,  
1101 and conduct a semi- annual meeting. These members will not be involved directly with the trial and will  
1102 perform several duties. First, they will review and approve the research protocol and plans for data and  
1103 safety monitoring prior to initiation of the study. Second, they will evaluate the progress of the trial. This  
1104 will include assessment of data quality, participant recruitment, accrual and retention, participant risk  
1105 versus benefit, performance of trial sites, and study outcomes. This assessment will be performed at  
1106 meetings every 6 months during the clinical trial and more frequently if needed. Third, they will make  
1107 recommendations to ensure that all of the issues above are appropriately addressed. The multiple PIs of  
1108 the project will be responsible for responding to all recommendations of the DSMB and submitting  
1109 DSMB reports to the respective IRBs. We will identify members for the DSMB when the project is  
1110 funded.

### 1111 13.3 Potential Study Benefits

1112 Potential Benefits of the Proposed Research to the Participants and Others Participants in this study will  
1113 benefit directly by receiving free health monitoring as well as weight management, nutrition, and

1114 physical activity education. The benefits of weight loss are many; weight loss can result in  
1115 improvements in hypertension, hyperglycemia, dyslipidemia, arthritis, sleep apnea, and many other  
1116 obesity-associated conditions. More importantly, while the subjects themselves might not derive  
1117 benefit, knowledge gained from the study will assist in the treatment of others who are overweight or  
1118 who attempt weight loss by one of the methods studied.

1119 13.4 Alternatives to Participation

1120 Participants may always consult with their primary care physician regarding ways to lose weight.

1121 13.5 Risk/Benefit Assessment

1122 Anticipated risks of this study should be minimal and the risk/benefit ratio is extremely favorable.  
1123 Participants who are obese are at greatly increased risk of many medical problems including diabetes,  
1124 hypertension, cardiovascular disease, musculoskeletal disorders, and certain cancers. Losing weight  
1125 would significantly lower these risks. To minimize the chance for serious and unexpected adverse  
1126 events, study participants will be screened through exclusion criteria for any health conditions that may  
1127 be exacerbated by participating in a weight loss study. Our incentives try to motivate a gradual rate of  
1128 weight loss that should pose little health risk in participants with BMIs of at least 30 on enrollment.  
1129 Weight loss will be monitored electronically and participants who are losing more than 5 pounds in a  
1130 week, 8 pounds in two weeks or 12 pounds in four consecutive weeks will be asked to slow down the  
1131 pace of their weight loss, and will be reminded that they do not receive any additional incentive for  
1132 losing more than an average expected pounds per month.

1133

1134

1135

1136

1137

1138

1139

1140

1141

1142

1143

1144

1145 **Healthy Weigh Statistical Analysis Plan - Modification**

1146 **Version 7/26/2018**

1147 **Overall Objectives/Specific Aims**

1148 Primary

- 1149 6. Assess the effectiveness of a daily lottery-based financial incentive, relative to the control  
1150 group, on cumulative weight loss over an 18-month period. *H1: Mean weight loss from*  
1151 *baseline to 18 months among participants randomized to the lottery incentive will be at least*  
1152 *5 kg greater than among control group participants.*
- 1153 7. Assess the effectiveness of environmental strategies, relative to the control group, on  
1154 cumulative weight loss over an 18-month period. *H2: Mean weight loss from baseline to 18*  
1155 *months among participants randomized to the environmental strategies group will be at*  
1156 *least 5 kg greater than among control group participants.*
- 1157 8. Assess the effectiveness of the combined incentives and environmental strategies arm,  
1158 relative to the control group, on cumulative weight loss over an 18-month period. *H3: Mean*  
1159 *weight loss from baseline to 18 months among participants randomized to the combined*  
1160 *arm will be at least 8 kg greater than among control group participants.*
- 1161 9. Assess the comparative effectiveness of a combination of lottery-based financial incentives  
1162 and environmental strategies on cumulative weight loss over an 18-month period. *H4: Mean*  
1163 *weight loss among participants randomized to the combined arm will be at least 3 kg*  
1164 *greater than among participants in either of the individual arms.*

1166 Secondary

- 1167
- 1168 10. Assess costs of each of the intervention arms from both the employer and social perspective  
1169 and compare cost differences between each arm relative to effectiveness measured by  
1170 incremental weight loss achieved. *H5: From an employer's perspective, each individual*  
1171 *intervention will have favorable cost-effectiveness ratios relative to control; the combined*  
1172 *arm will have a favorable cost-effectiveness ratio relative to individual arms.*

1173 **5. Primary Outcome Variable**

1174 5.1 Change in weight from baseline to 18 months.

1175 5.2 Specific Aims 1-3

1176 Compare effectiveness of financial incentive, environmental strategy, and combined arm to control  
1177 during Phases I and II. For expected weight change between months 0-18 of -8 kg, -5 kg and 0 kg in the  
1178 combined, intervention and control groups, respectively (a net difference between single intervention  
1179 and control groups of 5 kg and between combined intervention and control groups of 8 kg) and  
1180 assuming a standard deviation (SD) of weight loss of 5 kg, 65 participants per group provide greater than



1181 90% power to detect a difference with each intervention arm and control. With this sample size, there  
1182 will also be approximately 87% power to detect a difference between the combined intervention arm  
1183 and each of the single intervention arms. These calculations assume a 20% missing rate at the end of  
1184 Phase II and hypothesis testing done using the Holm p-value correction for multiple comparisons (more  
1185 details provided below).

#### 1186 5.3 Specific Aim 4

1187 Compare effectiveness of financial incentives and environmental strategies and combined arm during  
1188 Phases I and II.

### 1189 **6.0 Secondary Outcome Variable(s)**

#### 1190 Specific Aim 5

1191 6.1 Compare the cost differences between each arm relative to the effectiveness measured by  
1192 incremental weight loss achieved.

1193

### 1194 **7.0 Study Design**

#### 1195 8.1 Research Design and Methods

1196 Study participants will be obese employees recruited from three employers: SEPTA, IBC, and the City of  
1197 Philadelphia. We will structure the first 6 months of the study (Phase I) as a weight loss phase in which  
1198 participants will be encouraged as a weight loss goal to lose 0.5 pound per week [Note: weight loss  
1199 targets for sample size calculations use kg to fit in with the literature but we will use pounds for the  
1200 incentive targets, as that is what Americans are most familiar with]. Phase II (months 7-18) will consist of  
1201 a period of weight loss maintenance in which participants will be able to choose a weight loss goal each  
1202 month of either 0 or 0.5, pounds of weight loss per week. Phase III (months 19-24) will be a period of  
1203 post-intervention follow-up concluding with an in-person weigh-in at month 24.

1204 Participants will be randomized to either a control group (information provision and the standard  
1205 wellness program at each employer along with measurement of weight at 0, 6, 12, 18, and 24 months), a  
1206 lottery-based financial incentive, or a series of environmental strategies and counseling regarding food  
1207 intake and physical activity, or a combination of the financial incentive and environmental  
1208 strategies. Participants in the incentive arm will be eligible for daily winnings based on the weights that  
1209 are transmitted using wireless scales which we will provide so that they receive daily feedback on their  
1210 winnings to keep weight loss goals salient. However, we will only provide the full payments based on  
1211 validation of weight measurement at 6 months intervals, taking advantage of the motivating power of  
1212 loss aversion by highlighting to participants that they only receive their daily winnings if they continue to  
1213 maintain weight loss (or lose further weight) (an approach we have used with great success in previous  
1214 studies).

1215 **8.0 Outcome assessments**

1216 Weight for all participants will be ascertained in-person upon enrollment into the study and then at the  
1217 visits at the end of Phase I (6 months), at 12 and 18 months (end of Phase II), and at 24 months (end of  
1218 Phase III). The primary outcome will be change in the in-person weight from baseline to 18 months. We  
1219 will utilize other measures collected at months 6, 12, 18 and 24 as part of routine biometric assessments  
1220 by the participants' employers, all of whom share the same insurance carrier, Independence Blue Cross  
1221 (IBC). The allowable visit windows for these weight milestones are: -2/+4 weeks for the 6 month visit,  
1222 -2/+6 weeks for the 12 and 18 month visits, and -2/+8 weeks for the 24 month visit.

1223 **9. Statistical Considerations**

1224 9.1 Analytical Plan

1225 Descriptive analyses

1226 We will produce data summaries regularly using frequencies for categorical variables and means,  
1227 medians, and ranges for continuous variables. We will assess data quality and examine distributional  
1228 assumptions with graphical methods. To evaluate balance among groups achieved by randomization,  
1229 we will compare baseline values of all variables across the 4 arms using appropriate tests.

1230 General procedures

1231 All primary analyses will be on an intent-to-treat basis including each participant in the group to which  
1232 s/he was randomized, regardless of adherence to the assigned strategy. Given the high rates of missing  
1233 data typical of weight loss studies, handling of missing data is an important issue. Primary analyses will  
1234 use multiple imputation for the missing in-person weight outcome at 18 months, using the  
1235 randomization strata (sex, employer, initial BMI), study arm and other baseline variables as predictors in  
1236 the imputation model. Baseline variables will include age, race, income, education, marital status,  
1237 household size, physical activities, eating behavior index, stages of change, SF-36 General Health, and  
1238 baseline weight. Sensitivity analyses will be performed with imputation models that also use post-  
1239 baseline data, and recent weight loss trend before drop out, as well as an analysis that assumes that any  
1240 participants for whom follow-up weight loss data are unavailable have had their weight return to  
1241 baseline (weight at beginning of Pre Phase). Within each arm, this last assumption is likely to be  
1242 conservative but this may not be the case in inter-arm comparisons, depending on the dropout rates in  
1243 the different arms and true follow-up weights of the dropouts. Thus, a key secondary analysis will  
1244 consider the effect of differential dropout among the treatment arms. For this analysis, methods that  
1245 address potential patterns of MNAR may be considered in the missing data imputation, such as pattern  
1246 mixture models as appropriate. Finally, we will also consider a per-protocol type analysis, which  
1247 examines the difference in the intervention arms in the complete case data.

1248 Efficacy Analyses

1249 All hypotheses will be tested using two-sided, 0.05-level tests unless otherwise specified (notably the  
1250 Holm testing approach will be used for the five primary hypotheses in Specific Aims 1-4). The primary

1251 analyses will be an unadjusted intent-to-treat analyses, using a t-test for differences in weight change  
1252 from baseline to 18 months, as measured by the in-person weight, between each intervention group  
1253 and the control group, and the combined compared to each single intervention, applying the Holm-  
1254 Bonferroni corrected p-value for multiple comparisons testing. If weight change appears to be non-  
1255 normally distributed in the blinded data, we will find an appropriate statistical test accordingly. Missing  
1256 data will be handled as described above.

1257 Weight change between baseline and 18 months, with 95% confidence intervals (CIs), will be estimated  
1258 for comparison with adjusted analyses. We will estimate regression models adjusted for the  
1259 stratification variables (sex, employer, initial BMI) and other participant characteristics factors including  
1260 age, race, income, and education. We will evaluate the evidence of confounding for other baseline  
1261 (baseline weight, marital status, household size, physical activities- i.e total minutes of  
1262 MVPA+walking/week, eating behavior index, stage of change, SF-36 General Health) using change in  
1263 estimate criterion (10%). We will fit exploratory models of the repeated weight measurements that  
1264 incorporate time as a polynomial function or using visit-specific indicator variables to determine the  
1265 most parsimonious model that adequately describes the observed patterns, as necessary. Models will be  
1266 built separately for the in-person and at home weight data. Models using the at-home weight data  
1267 would be considered only as potential exploratory analyses comparing the 3 intervention arms, since at-  
1268 home weights are not available for the control arm. We will investigate random-effects models that  
1269 allow for baseline individual variability as well as variability in the changes in weights over time; an  
1270 example is the following:  $E(\text{weight}_{ij}) = \beta_0 + \beta_1 \text{Time}_j + \beta_2 \text{Group}_i + \beta_3 X_i + b_{0i} + b_{1i} \text{Time}_j$ , where  $i$  indicates  
1271 subject,  $j$  indicates assessment times, the parameters are fixed effects linking time, a treatment group  
1272 vector, and a vector of other demographic or clinical covariates  $X_i$  to the outcomes, and  $b_{0i}$  and  $b_{1i}$  are  
1273 random intercept and slope effects. Tests for significance of random effects will use likelihood ratio tests  
1274 for nested models; we will compare models with different random effects structures using the  
1275 maximized log-likelihoods and the Akaike Information Criterion (AIC). We will apply standard diagnostic  
1276 techniques to assess model adequacy. We will use treatment by time interactions to assess whether the  
1277 rate of change in weight differs by intervention arm. We hypothesize that incentives may be more  
1278 effective among lower income individuals and will evaluate this using interaction terms of income with  
1279 treatment group. We will explore differential effects by race and education and baseline levels of  
1280 intrinsic motivation and stages of change. We will also consider other potential mediators, such as the  
1281 home food and activity environment. To assess the sensitivity of treatment effect estimates to missing  
1282 data, we may fit hierarchical or mixed effects models with and without accounting for informative  
1283 missing data.

1284

1285 For Specific Aim 5, we'll consider appropriate methods for cost effective analysis such as the models  
1286 proposed below. We will assess the costs of each of the intervention arms from both the employer and  
1287 social perspective and compare the cost differences between each arm relative to the effectiveness  
1288 measured by incremental weight loss achieved. The principal incremental cost-effectiveness ratios  
1289 between intervention and control arms will be from the employer's perspective and we will compare  
1290 costs during the intervention from baseline to 18 months per unit change in weight. Secondary analyses

1291 may also 1) evaluate this same ratio but use either 6 months post- intervention data (24 month visit) or  
1292 12 months of intervention data (12 month visit) and 2) evaluate these 2 ratios using a limited social  
1293 perspective. Cost models will use a generalized linear model with a log link and gamma family. Missing  
1294 data strategies will parallel those described above. We will assess sampling uncertainty for the  
1295 comparison of costs and effects by calculating parametric 95% CIs for the cost per kg lost and  
1296 acceptability curves. Standard errors and correlation of the difference in cost and effect will be derived  
1297 using a bootstrap procedure.

## 1298 9.2 Power and Sample Size Considerations

1299 We have designed the study with adequate power to detect differences in weight loss over an 18-month  
1300 period. Our intervention should achieve its maximal impact in maintaining initial weight loss at the end  
1301 of Phase II (month 18), when the incentive payments cease. To maintain the experiment-wide Type I  
1302 error and guard against false conclusions of effectiveness, we will use the Holm multiple  
1303 comparisons adjustment for test the 5 primary comparisons in Specific Aims 1-4 . If the interventions are  
1304 as effective as hypothesized, the proposed sample size maintains greater than 90% power to show  
1305 significance for each of the three intervention arms compared to control and greater than 80% power to  
1306 show significance for the combined intervention group compared to each of the two interventions  
1307 alone.

1308 It is important to note that while we originally planned to recruit 328 participants, a small subset was  
1309 unable to successfully set up their Withings scales post randomization due to Wi-Fi connectivity issues.  
1310 Therefore, we increased our target sample size by the number of people who were unable to connect  
1311 their Withings scales to the Way To Health platform (16 additional subjects), bringing our recruitment  
1312 total to 344 participants. The final statistical analysis is adjusted for the stratification factors to account  
1313 for any imbalances that may have occurred. We have previously communicated this information to the  
1314 IRB and the members of the Data Safety and Monitoring Board (DSMB), who approved this approach.  
1315 The following information outlines our original power calculations and sample size considerations.

1316 We plan to recruit approximately one third of the participants required for the start of Phase I from each  
1317 of our participating employers (IBC, SEPTA, and City of Philadelphia). Given the large number of  
1318 potentially eligible employees, we can, if needed, easily increase the proportion of participants from any  
1319 of these employers to meet recruitment targets. Participants will be randomized to our 3 intervention  
1320 groups and the control group using a 1:1 ratio for the intervention arms. We built in a margin of 20% of  
1321 our original target sample size of 328 for potential attrition before the 18-month assessment, resulting  
1322 in an expected 260 participants (65 per arm) who are available for analysis at the end of Phase II. This  
1323 sample size will provide us with greater than 90% power to detect a difference in weight change  
1324 between baseline and the 18-month weigh-in of 5 kg between each single intervention group and the  
1325 control group (primary outcomes for Specific Aims 1-3) and 87% power to detect a 3 kg difference  
1326 between the combined group and either the incentive or environmental strategies groups (Specific Aim  
1327 4). Namely, we will have greater than 85% power for the 5 primary comparisons of interest for an  
1328 expected weight change between months 0-18 of -8 kg, -5 kg and 0 kg in the combined, intervention and  
1329 control groups, respectively (a net difference between single intervention and control groups of 5 kg,

1330 combined intervention and control groups of 8 kg, and 3kg between the single interventions and  
1331 combined group) and assuming a standard deviation (S.D.) of weight loss of 5 kg. We will also have  
1332 greater than 80% power to detect a difference of 4.6 kg in weight change between single intervention  
1333 and control groups and 7.3 kg between the combined and control groups (primary outcomes for Specific  
1334 Aims 1-3), while maintaining approximately 80% power for a 2.7 kg difference between the combined  
1335 and each single intervention (Specific Aim 4). For our secondary outcomes (Specific Aim 5), we wish to  
1336 compare the cost differences between each arm relative to the effectiveness measured by incremental  
1337 weight loss achieved. We will calculate a point estimate of cost per kg of weight loss based on  
1338 estimated inter-arm differences in weight loss and the incremental cost of the interventions, as  
1339 described in C.3.d.ii.c. For weight loss at 18 months, given an expected incremental cost of \$810  
1340 (incentives) and incremental weight loss of 5 kg, 328 participants provide 80% power to detect a cost  
1341 per kg lost of \$430 and greater than 90% power to detect a cost per kg lost of \$575. This study is  
1342 primarily a test of the efficacy of these interventions. Due to resource constraints and because we do  
1343 not yet know about intervention effectiveness, we did not power this study based on cost effectiveness  
1344 analyses. Estimated detectable costs per kg are a function of wide confidence intervals due to sample  
1345 size.

1346 **10.0 Measurement of effect:**

1347 The goal of this analysis will be to assess relative weight loss in the intervention arms relative to control.  
1348 For the principal cost-effectiveness analysis, measurement of incremental weight loss will be based  
1349 on differences in weight between baseline and the 18 month visit; in secondary analyses it will be  
1350 based on weight differences between baseline and 24 months and baseline and 12 months.

1351
