# Supplementary material for: Effect of Financial Incentives and Environmental Strategies on Weight Loss in the Healthy Weigh Study: A Randomized Clinical Trial
Source: PubMed Central journal article supplement (PMC8424479; doi:10.1001/jamanetworkopen.2021.24132), 2021-09-07
Supplement: jamanetwopen-e2124132-s003.pdf [file jamanetwopen-e2124132-s003.pdf]

## Data Sharing Statement

Glanz. Effect of Financial Incentives and Environmental Strategies on Weight Loss in The Healthy Weigh Study. *JAMA Netw Open*. Published September 07, 2021. doi:10.1001/jamanetworkopen.2021.24132

### Data

**Data available:** Yes

**Data types:** Deidentified participant data

**How to access data:** [kglanz@upenn.edu](mailto:kglanz@upenn.edu)

**When available:** With publication

### Supporting Documents

**Document types:** None

### Additional Information

**Who can access the data:** Researchers whose proposed use of the data has been approved.

**Types of analyses:** For a specified purpose.

**Mechanisms of data availability:** With a signed data access agreement.
